# Supplementary material for: Episodic Binge-like Ethanol Reduces Skeletal Muscle Strength Associated with Atrophy, Fibrosis, and Inflammation in Young Rats
Source: MDPI journal article supplement (doi:10.3390/ijms24021655), 2023-01-14
Supplement: s1 [file s1]

## Supplementary Figures

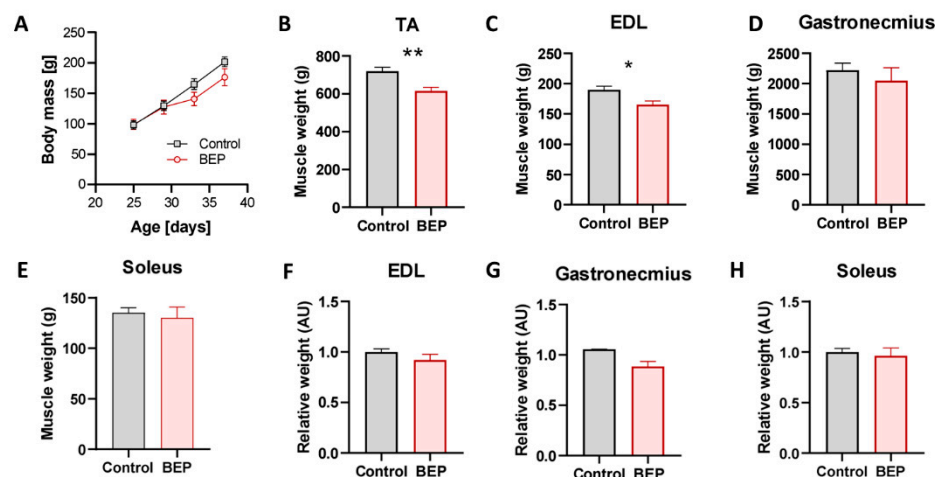

**Supplementary Figure S1. Binge-like ethanol protocol decreases muscles weight.** Muscle weight of TA (A), EDL (B), Gastrocnemius (C), and soleus (D). E-G. The relative weight of EDL, Gastrocnemius (F), and soleus (G). Relative weight was determined by normalizing the weight of muscles to the weight of control muscles. Graphs represent mean  $\pm$  SEM. N Control = 2 N BEP = 4. \*  $p \leq 0.05$ ; \*\*  $p \leq 0.01$ .

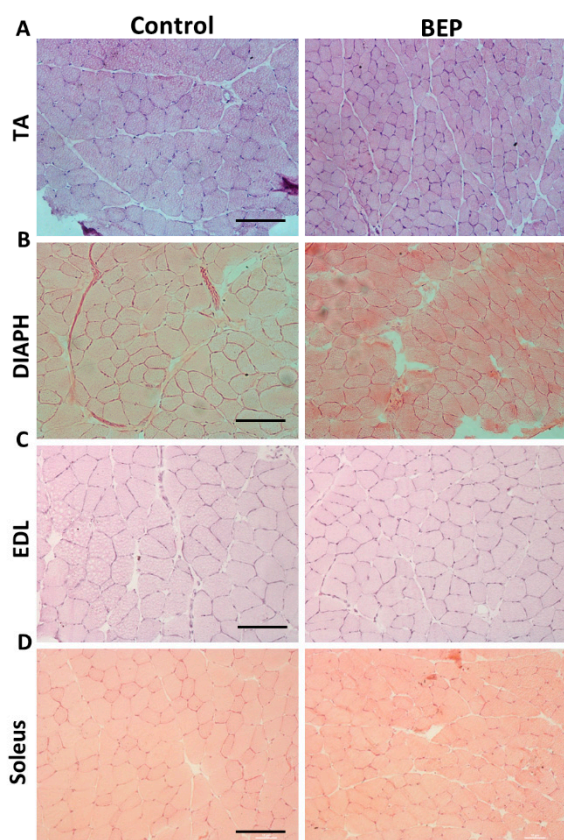

**Supplementary Figure S2. Binge-like ethanol protocol does not alter muscle morphology.** A, B, C and D. Representative images of hematoxylin eosin stained muscle sections of TA (A), DIAPH (B), EDL (C) and Soleus (D). Scale bar 100. Control N= 6, BEP N= 4.

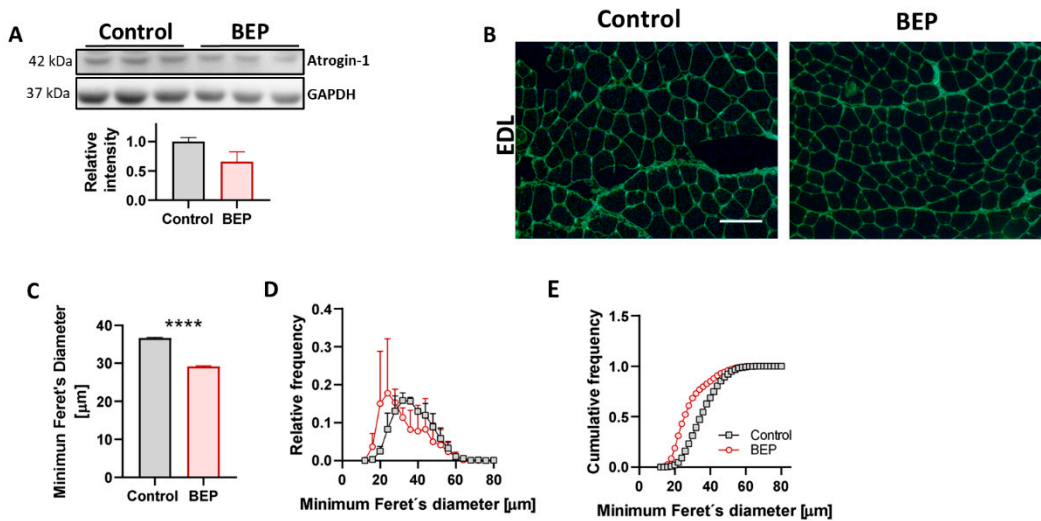

**Supplementary Figure S3. Binge-like ethanol protocol induces skeletal muscle atrophy.** **A.** Immunoblot of Atrogin-1, and GAPDH as a loading control, and densitometric quantification on TA muscle. Control N=4, BEP N=4. **B.** Representative image of WGA-stained muscle sections of EDL. Scale bar 100  $\mu\text{m}$ . **C.** Quantification of minimum Feret's diameter of skeletal muscle fibers of EDL. Control N=3, BEP N=2. Graphs represent mean  $\pm$  SEM, 7 images per N. **D.** Histogram showing relative frequencies of minimum Feret's diameter in EDL. **E.** Histogram showing cumulative frequencies of minimum Feret's diameter in EDL. Graphs represent mean  $\pm$  SEM. \*\*\*\*  $p \leq 0.0001$ .

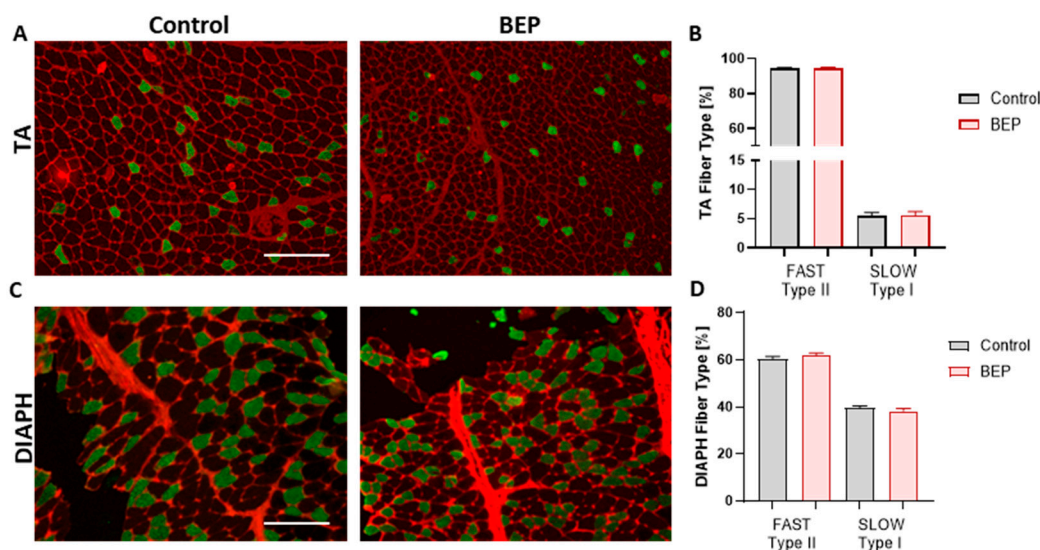

**Supplementary Figure S4. Binge-like ethanol protocol does not alter muscle fiber type proportion.** **A, C.** Representative images of TA (A) and DIAPH (C) immunofluorescence using WGA (red) and anti- Slow Myosin antibody (green). Fibers stained in green correspond to slow type I fibers, and non-stained fibers in black correspond to fast type II fibers. Scale bar: 100  $\mu\text{m}$ . **B, D.** Percentage of fiber types on TA (B) and DIAPH (D). Control N=5, BEP N=6.

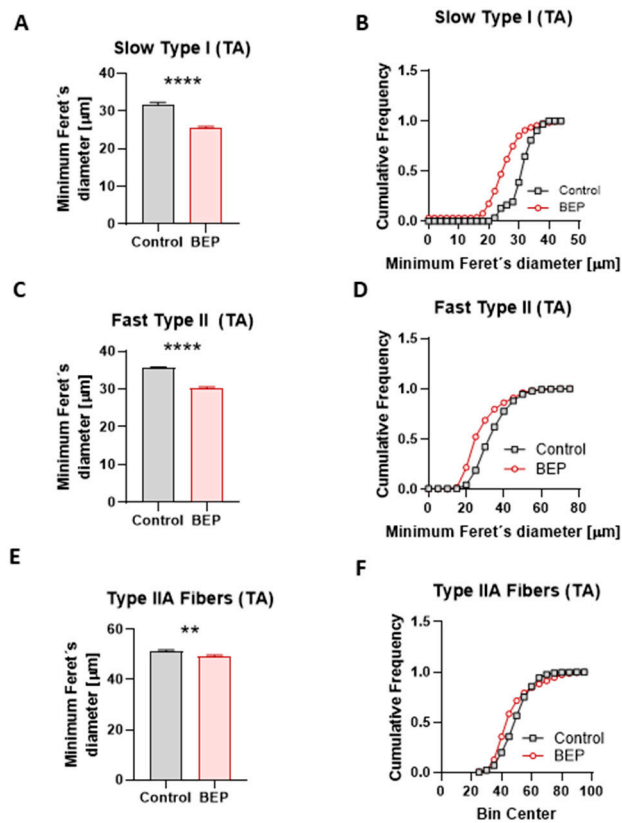

**Supplementary Figure S5. Binge-like ethanol protocol induce atrophy independent of skeletal muscle fiber type.** A, C, E. Quantification of minimum Feret's diameter of slow type I (A), fast II type (C) and type IIA (E) skeletal muscle fibers of TA. Control N=3, BEP N=2. F, I. Histograms showing cumulative frequencies as fraction of minimum Feret's diameter of slow type I (B), fast II type (D) and type IIA (F) skeletal muscle fibers of TA. Control N=3, BEP N=2. \*\*  $p \leq 0.01$ ; \*\*\*\*  $p \leq 0.0001$

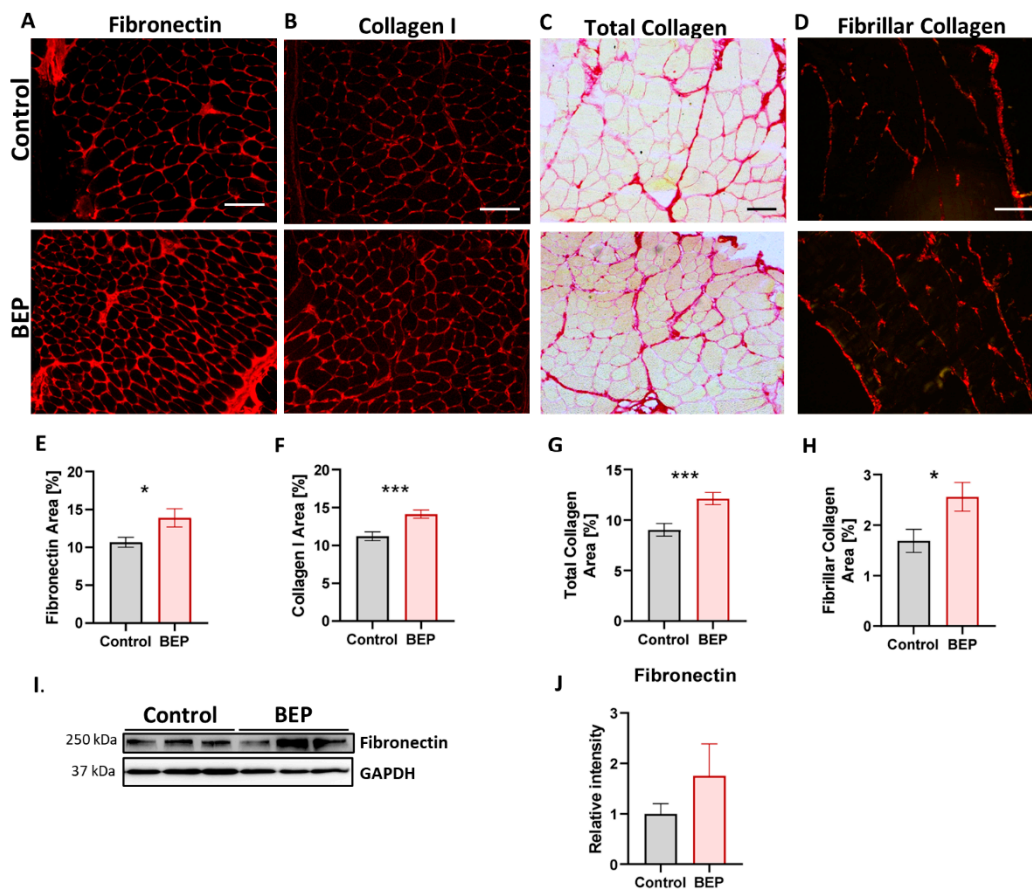

**Supplementary Figure S6. Binge-like ethanol protocol induces ECM protein accumulation and enhances fibrotic markers on DIAPH muscle.** **A, B.** Representative images of DIAPH immunofluorescence using anti-fibronectin (**A**) and anti-collagen I (**B**) antibodies. **C, D.** Representative images of Sirius Red staining in brightfield microscopy showing total collagen (**C**) and polarized light microscopy showing fibrillar collagen (**D**). Scale bar 100  $\mu$ m. **E-H.** Quantification of fibronectin (**E**), collagen I (**F**), total collagen (**G**), and fibrillar collagen (**H**) as a percentage of occupied area fraction. Control N=5, BEP N=6. **I.** Immunoblot against fibronectin and GAPDH as a loading control. **J.** Densitometric quantification of immunoblots against fibronectin. Control N=4, BEP N=4. \*  $p \leq 0.05$ ; \*\*\*  $p \leq 0.001$ .

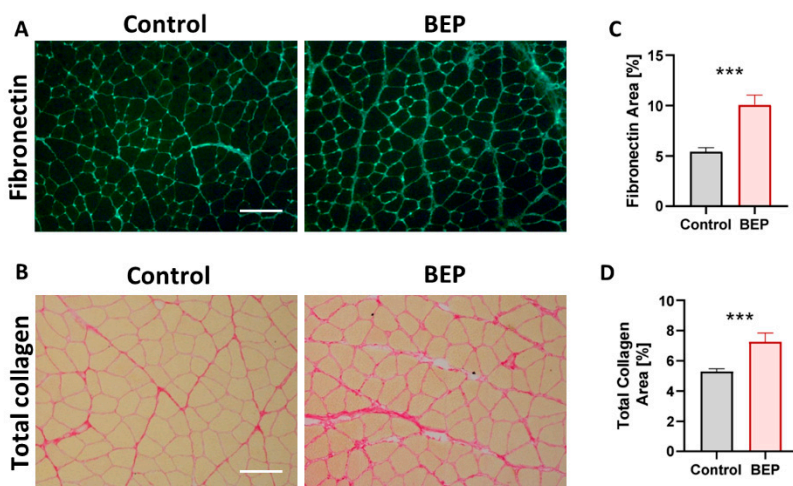

**Supplementary Figure S7. Binge-like ethanol protocol induces ECM protein accumulation on EDL and soleus muscle.** **A.** Representative images of EDL immunofluorescence using anti-fibronectin antibody. **B.** Representative images of Sirius Red staining in brightfield microscopy showing total collagen in soleus. **C, D.** Quantification of fibronectin (**C**) and total collagen (**D**) as a percentage of occupied area fraction. Control N=3, BEP N=2. Graphs represent mean  $\pm$  SEM, 7 images per N. Scale bar 100  $\mu$ m. \*\*\*  $p \leq 0.001$ .
